# Supplementary material for: ENSO feedback drives variations in dieback at a marginal mangrove site
Source: PubMed Central journal article supplement (PMC8046780; doi:10.1038/s41598-021-87341-5), 2021-04-14
Supplement: 41598_2021_87341_MOESM1_ESM.pdf [file 41598_2021_87341_MOESM1_ESM.pdf]

## ***Supplementary Information***

### **ENSO feedback drives variations in dieback for a marginal mangrove site**

Hickey, S. M.<sup>1,2,3\*</sup>, Radford B.<sup>1,2,3</sup>, Callow, J. N.<sup>1</sup>, Phinn, S. R.<sup>4</sup>, Duarte, C.M.<sup>5</sup>, Lovelock, C.E.<sup>6</sup>

<sup>1</sup>The School of Agriculture and Environment, Faculty of Science, University of Western Australia, Perth, WA, Australia

<sup>2</sup>The Oceans Institute, University of Western Australia, Perth, WA, Australia

<sup>3</sup>Australian Institute of Marine Science (AIMS), Crawley, WA, Australia

<sup>4</sup>Remote Sensing Research Centre, School of Earth and Environmental Sciences, The University of Queensland, Brisbane, Queensland, Australia

<sup>5</sup>Red Sea Research Center, King Abdullah University of Science and Technology, Thuwal, Saudi Arabia

<sup>6</sup>School of Biological Sciences, The University of Queensland, Brisbane, Queensland, Australia

*\*corresponding author: sharyn.hickey@uwa.edu.au*

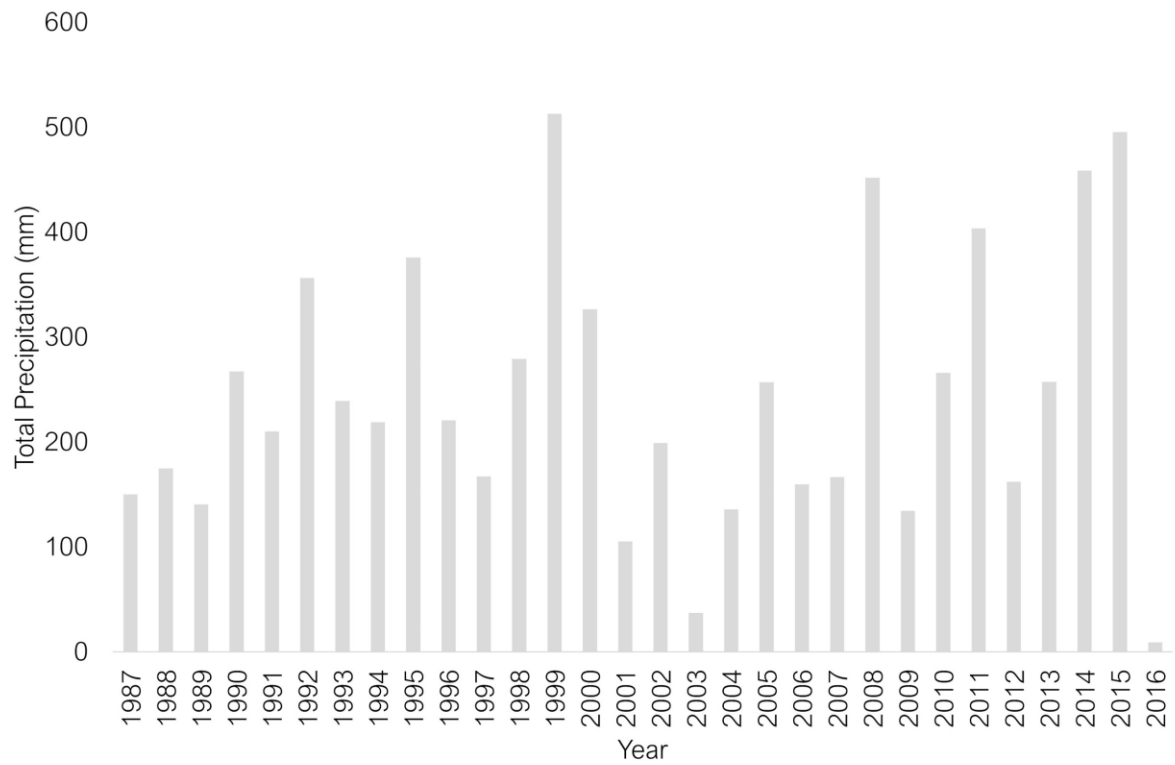

SI1 Figure A: Total annual precipitation recorded for Mangrove Bay (measured at Learmonth Bureau of Meteorology station) used in GAMM analysis. Low precipitation in 2003 coincided with El Nino and mangrove dieback at the site (Lovelock et al., 2017).

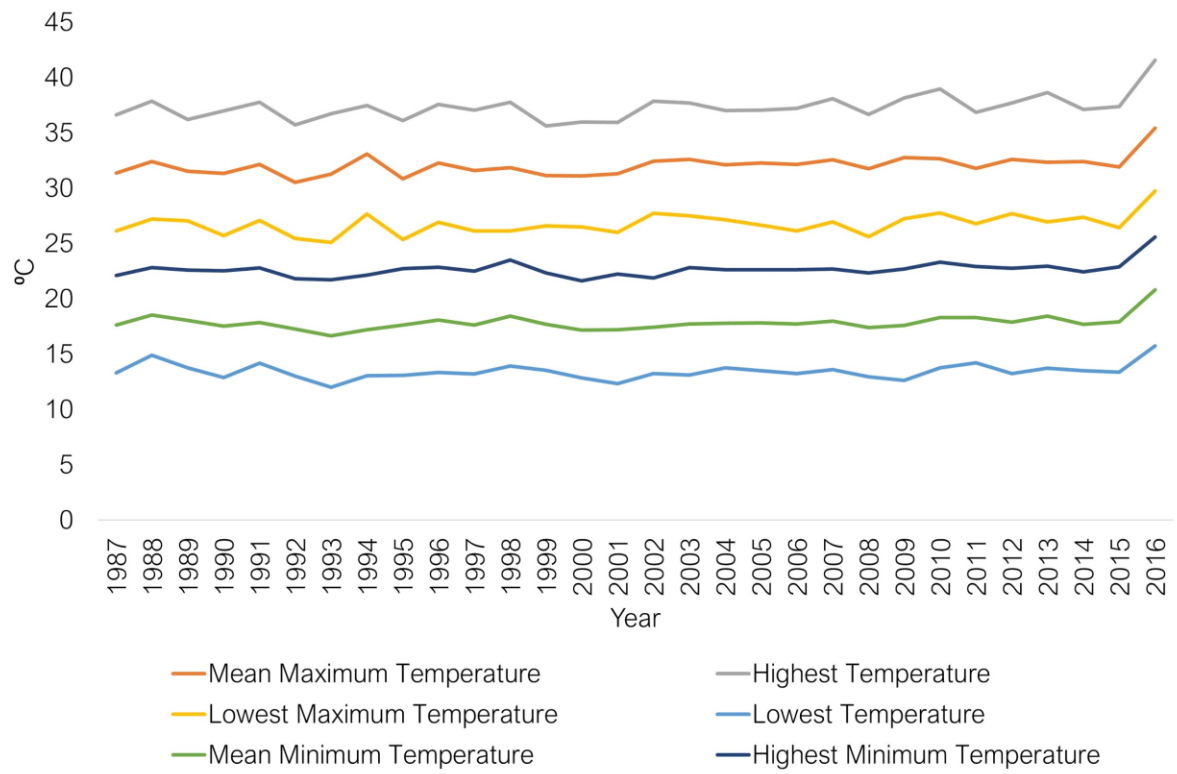

SI1 Figure B: Annual averages of temperature variables used in GAMM analysis recorded for Mangrove Bay (measured at Learmonth Bureau of Meteorology station).

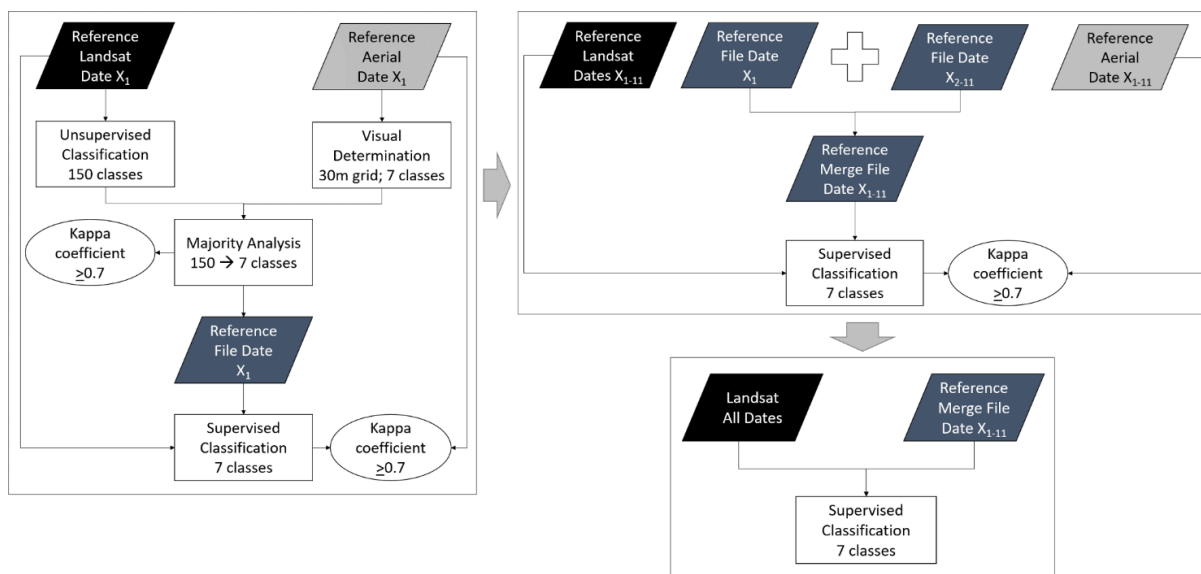

Figure S12: Conceptual diagram showing the process of mangrove classification, showing initial unsupervised classification and supervised classification. A maximum likelihood algorithm was used. Accuracy assessment was undertaken using kappa coefficients (see Table ).

Table S13: Bands and wavelengths utilised in the mangrove classification for Landsat 5, 7 TM and 8 OLI.

| <b>Bands Landsat 5 and 7</b>         | <b>Landsat 5 TM Wavelength (micrometers)</b> | <b>Landsat 7 TM Wavelength (micrometers)</b> | <b>Bands Landsat 8</b>               | <b>Landsat 8 OLI Wavelength (micrometers)</b> |
|--------------------------------------|----------------------------------------------|----------------------------------------------|--------------------------------------|-----------------------------------------------|
| Band 1 - Blue                        | 0.45-0.52                                    | 0.45-0.52                                    | Band 2 - Blue                        | 0.452 - 0.512                                 |
| Band 2 - Green                       | 0.52-0.60                                    | 0.52-0.60                                    | Band 3 - Green                       | 0.533 - 0.590                                 |
| Band 3 - Red                         | 0.63-0.69                                    | 0.63-0.69                                    | Band 4 - Red                         | 0.636 - 0.673                                 |
| Band 4 - Near Infrared (NIR)         | 0.76-0.90                                    | 0.77-0.90                                    | Band 5 - Near Infrared (NIR)         | 0.851 - 0.879                                 |
| Band 5 - Shortwave Infrared (SWIR) 1 | 1.55-1.75                                    | 1.55-1.75                                    | Band 6 - Shortwave Infrared (SWIR) 1 | 1.566 - 1.651                                 |
| Band 7 - Shortwave Infrared (SWIR) 2 | 2.08-2.35                                    | 2.09-2.35                                    | Band 7 - Shortwave Infrared (SWIR) 2 | 2.107 - 2.294                                 |

SI4: Description of classes used to classify the Mangrove bay site from aerial and Landsat scenes.  
Only the class, mangrove is analysed in this study.

---

| Vegetation Type                                                 | Description                                                                                            |
|-----------------------------------------------------------------|--------------------------------------------------------------------------------------------------------|
| Mangrove                                                        | Dense mangrove trees, or trees covering 80% surface area                                               |
| Mangrove/Saltmarsh                                              | Combined area of mangrove and saltmarsh. Mangrove is the majority component (>50%)                     |
| Other vegetation/sand                                           | Combined area of coastal grasses on sand                                                               |
| Mangrove/ saltmarsh/saltflat/sand (may include coastal grasses) | Combined area of saltflat, saltmarsh and mangrove                                                      |
| Saltflat/sand                                                   | Saltflat or sand area that is adjacent to mangroves and/or saltmarsh but has minimal (<20%) vegetation |
| Water                                                           | Water including adjacent coast, and internal lagoons                                                   |
| Mangrove/Water                                                  | Combined mangrove and lagoon area. May also be mangroves fringing coast, or lagoon entrance            |

---

SI5: Results of the accuracy assessment of mangrove classification. Error matrices of supervised classification with reference data. Error matrices were carried out on all pixels (30mx30m) ( $n_{pixels} = 8400$ ) within study region. Kappa coefficients and overall accuracy show strong agreement across reference data and supervised classification.

| Landsat Scene Date<br>(Landsat series) | Orthorectified Aerial Image<br>Date | Error Measurement<br>(%) | Kappa | overall<br>accuracy |       |
|----------------------------------------|-------------------------------------|--------------------------|-------|---------------------|-------|
| May-1987 (5)                           | Mar-1985                            | Agreement                | 93.27 | 0.82                | 88.37 |
|                                        |                                     | Omission                 | 6.73  |                     |       |
|                                        |                                     | Commission               | 32.64 |                     |       |
| Dec-1999 (5)                           | Aug-2000                            | Agreement                | 90.48 | 0.78                | 85.30 |
|                                        |                                     | Omission                 | 9.52  |                     |       |
|                                        |                                     | Commission               | 29.15 |                     |       |
| Jul-2003 (5)                           | Jul-2003                            | Agreement                | 94.34 | 0.80                | 86.92 |
|                                        |                                     | Omission                 | 5.66  |                     |       |
|                                        |                                     | Commission               | 34.64 |                     |       |
| Oct-2006 (5)                           | Oct-2006                            | Agreement                | 95.00 | 0.79                | 86.32 |
|                                        |                                     | Omission                 | 5.00  |                     |       |
|                                        |                                     | Commission               | 39.77 |                     |       |
| Aug-2007 (5)                           | Aug-2007                            | Agreement                | 91.22 | 0.71                | 80.06 |
|                                        |                                     | Omission                 | 8.78  |                     |       |
|                                        |                                     | Commission               | 20.86 |                     |       |
| Nov-2008 (5)                           | Nov-2008                            | Agreement                | 96.54 | 0.76                | 83.55 |
|                                        |                                     | Omission                 | 3.46  |                     |       |
|                                        |                                     | Commission               | 26.40 |                     |       |
| Dec-2010 (5)                           | Oct-2010                            | Agreement                | 95.40 | 0.81                | 87.19 |
|                                        |                                     | Omission                 | 4.60  |                     |       |
|                                        |                                     | Commission               | 22.19 |                     |       |
| Jun-2011 (5)                           | Jul-2011                            | Agreement                | 83.96 | 0.80                | 86.49 |
|                                        |                                     | Omission                 | 16.04 |                     |       |
|                                        |                                     | Commission               | 15.51 |                     |       |
| Aug-2000 (7)                           | Aug-2000                            | Agreement                | 81.86 | 0.85                | 90.49 |
|                                        |                                     | Omission                 | 18.14 |                     |       |
|                                        |                                     | Commission               | 21.08 |                     |       |
| Sept-2013 (8)                          | Sept-2013                           | Agreement                | 91.18 | 0.80                | 85.63 |
|                                        |                                     | Omission                 | 8.82  |                     |       |
|                                        |                                     | Commission               | 13.55 |                     |       |
| Jul-2014 (8)                           | Jul-2014                            | Agreement                | 93.12 | 0.80                | 86.35 |
|                                        |                                     | Omission                 | 6.89  |                     |       |
|                                        |                                     | Commission               | 19.12 |                     |       |

SI6: AICc results of GAMMs analysis (top 10 models). + indicates the variable is included in the model. The best model is 1: SOI and mean minimum temperature indicated by the lowest AICc score, and lowest number of variables. The model with only the intercept is included.

| Model Number | Intercept   | Highest Minimum Temperature | Highest Temperature | Lowest Maximum Temperature | Lowest Temperature | Mean Maximum Temperature | Mean Minimum Temperature | Total Precipitation | SOI | AIC      | df | logLik | AICc     | delta   | weight |
|--------------|-------------|-----------------------------|---------------------|----------------------------|--------------------|--------------------------|--------------------------|---------------------|-----|----------|----|--------|----------|---------|--------|
| 1            | 17.27508621 | NA                          | NA                  | NA                         | NA                 | NA                       | +                        | NA                  | +   | 324.4473 | 7  | -155   | 326.6873 | 0.0000  | 0.2444 |
| 2            | 17.27508621 | NA                          | +                   | NA                         | NA                 | NA                       | NA                       | NA                  | +   | 325.2180 | 7  | -156   | 327.4580 | 0.7707  | 0.1663 |
| 3            | 17.27508621 | NA                          | NA                  | NA                         | NA                 | +                        | NA                       | NA                  | +   | 326.1343 | 7  | -156   | 328.3743 | 1.6870  | 0.1051 |
| 4            | 17.27508621 | NA                          | NA                  | NA                         | +                  | NA                       | NA                       | NA                  | +   | 326.2381 | 7  | -156   | 328.4781 | 1.7908  | 0.0998 |
| 5            | 17.27508621 | +                           | NA                  | NA                         | NA                 | NA                       | +                        | NA                  | +   | 327.0471 | 9  | -155   | 330.7971 | 4.1098  | 0.0313 |
| 6            | 17.27508621 | NA                          | +                   | NA                         | NA                 | NA                       | NA                       | +                   | +   | 327.0772 | 9  | -155   | 330.8272 | 4.1398  | 0.0308 |
| 7            | 17.27508621 | NA                          | +                   | NA                         | NA                 | NA                       | +                        | NA                  | +   | 327.1768 | 9  | -155   | 330.9268 | 4.2394  | 0.0293 |
| 8            | 17.27508621 | NA                          | NA                  | +                          | NA                 | NA                       | NA                       | NA                  | +   | 328.8892 | 7  | -157   | 331.1292 | 4.4418  | 0.0265 |
| 9            | 17.27508621 | NA                          | NA                  | NA                         | NA                 | +                        | +                        | NA                  | +   | 327.8737 | 9  | -155   | 331.6237 | 4.9363  | 0.0207 |
| 10           | 17.27508621 | +                           | NA                  | NA                         | NA                 | NA                       | NA                       | NA                  | +   | 329.5205 | 7  | -158   | 331.7605 | 5.0731  | 0.0193 |
| Intercept    | 17.27508621 | NA                          | NA                  | NA                         | NA                 | NA                       | NA                       | NA                  | NA  | 359.6131 | 3  | -177   | 360.0575 | 33.3702 | 0.0000 |

SI7: Equation 1: Normalised Difference Vegetation Index (NDVI). Refer to Table SI3 for band and wavelength information.

$$\text{NDVI} = \frac{\text{NIR band} - \text{Red band}}{\text{NIR band} + \text{Red band}} \quad (\text{Equation 1})$$

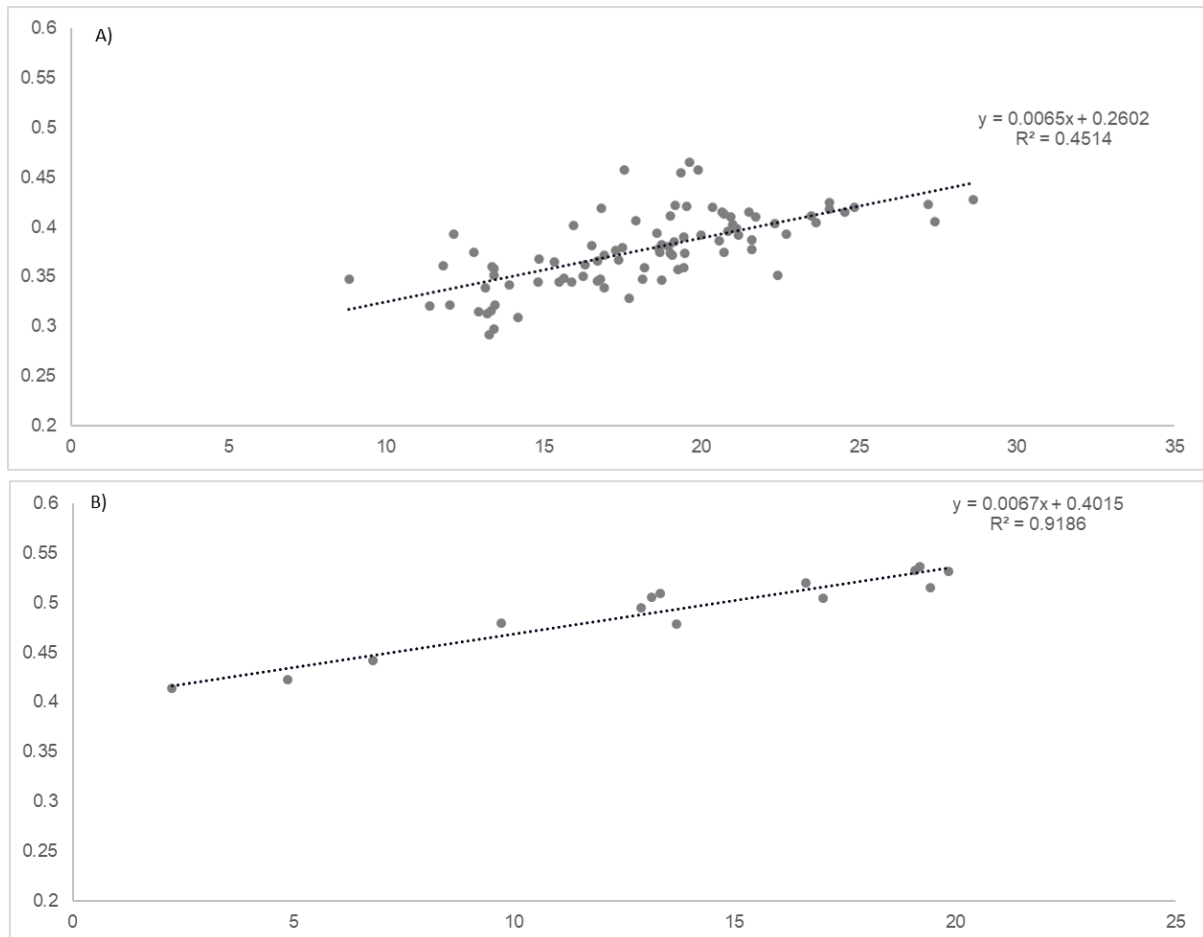

Figure SI8: Relationship between mangrove NDVI and mangrove area for each time-point. NDVI and area are closely related, with NDVI increasing linearly when area increases. Landsat 5, 7 derived data shown in A, and Landsat 8 derived data in B.



SI9: Landsat Scenes (n=213) used in analysis. \* denotes reference layer used in accuracy assessment (n=11) (Table 2).

| Landsat   | Month | Year | Landsat Scenes         |
|-----------|-------|------|------------------------|
| Landsat 5 | 5     | 1987 | LT51150751987149ASA00* |
| Landsat 5 | 8     | 1987 | LT51150751987229ASA00  |
| Landsat 5 | 9     | 1987 | LT51150751987261ASA00  |
| Landsat 5 | 10    | 1987 | LT51150751987293ASA00  |
| Landsat 5 | 11    | 1987 | LT51150751987325ASA00  |
| Landsat 5 | 12    | 1987 | LT51150751987341ASA00  |
| Landsat 5 | 1     | 1988 | LT51150751988008ASA00  |
| Landsat 5 | 2     | 1988 | LT51150751988056ASA00  |
| Landsat 5 | 3     | 1988 | LT51150751988072ASA00  |
| Landsat 5 | 4     | 1988 | LT51150751988104ASA00  |
| Landsat 5 | 5     | 1988 | LT51150751988152ASA00  |
| Landsat 5 | 6     | 1988 | LT51150751988168ASA00  |
| Landsat 5 | 7     | 1988 | LT51150751988200ASA00  |
| Landsat 5 | 8     | 1988 | LT51150751988232ASA00  |
| Landsat 5 | 9     | 1988 | LT51150751988264ASA00  |
| Landsat 5 | 10    | 1988 | LT51150751988296ASA00  |
| Landsat 5 | 11    | 1988 | LT51150751988328ASA00  |
| Landsat 5 | 12    | 1988 | LT51150751988360ASA00  |
| Landsat 5 | 1     | 1989 | LT51150751989026ASA00  |
| Landsat 5 | 5     | 1989 | LT51150751989138ASA00  |
| Landsat 5 | 6     | 1989 | LT51150751989170ASA00  |
| Landsat 5 | 7     | 1989 | LT51150751989186ASA00  |
| Landsat 5 | 8     | 1989 | LT51150751989218ASA01  |
| Landsat 5 | 9     | 1989 | LT51150751989266ASA00  |
| Landsat 5 | 10    | 1989 | LT51150751989282ASA00  |
| Landsat 5 | 11    | 1989 | LT51150751989330ASA00  |
| Landsat 5 | 12    | 1989 | LT51150751989362ASA00  |
| Landsat 5 | 4     | 1990 | LT51150751990109ASA00  |
| Landsat 5 | 5     | 1990 | LT51150751990141ASA00  |
| Landsat 5 | 6     | 1990 | LT51150751990173ASA00  |
| Landsat 5 | 7     | 1990 | LT51150751990205ASA00  |
| Landsat 5 | 8     | 1990 | LT51150751990237ASA00  |
| Landsat 5 | 9     | 1990 | LT51150751990253ASA00  |
| Landsat 5 | 12    | 1990 | LT51150751990349ASA00  |
| Landsat 5 | 2     | 1991 | LT51150751991048ASA00  |
| Landsat 5 | 5     | 1991 | LT51150751991128ASA00  |
| Landsat 5 | 7     | 1991 | LT51150751991192ASA00  |
| Landsat 5 | 8     | 1991 | LT51150751991224ASA00  |

---

|           |    |      |                       |
|-----------|----|------|-----------------------|
| Landsat 5 | 9  | 1991 | LT51150751991256ASA00 |
| Landsat 5 | 10 | 1991 | LT51150751991288ASA00 |
| Landsat 5 | 11 | 1991 | LT51150751991320ASA00 |
| Landsat 5 | 12 | 1991 | LT51150751991336ASA00 |
| Landsat 5 | 1  | 1992 | LT51150751992003ASA00 |
| Landsat 5 | 2  | 1992 | LT51150751992035ASA00 |
| Landsat 5 | 3  | 1992 | LT51150751992067ASA00 |
| Landsat 5 | 4  | 1992 | LT51150751992099ASA00 |
| Landsat 5 | 6  | 1992 | LT51150751992179ASA00 |
| Landsat 5 | 7  | 1992 | LT51150751992195ASA00 |
| Landsat 5 | 8  | 1992 | LT51150751992227ASA00 |
| Landsat 5 | 9  | 1992 | LT51150751992259ASA00 |
| Landsat 5 | 12 | 1992 | LT51150751992339ASA00 |
| Landsat 5 | 3  | 1993 | LT51150751993069ASA00 |
| Landsat 5 | 4  | 1993 | LT51150751993117ASA00 |
| Landsat 5 | 6  | 1993 | LT51150751993165ASA00 |
| Landsat 5 | 7  | 1993 | LT51150751993197ASA00 |
| Landsat 5 | 8  | 1993 | LT51150751993229ASA00 |
| Landsat 5 | 9  | 1993 | LT51150751993245ASA00 |
| Landsat 5 | 10 | 1993 | LT51150751993277ASA00 |
| Landsat 5 | 11 | 1993 | LT51150751993325ASA00 |
| Landsat 5 | 1  | 1994 | LT51150751994008ASA00 |
| Landsat 5 | 2  | 1994 | LT51150751994040ASA00 |
| Landsat 5 | 3  | 1994 | LT51150751994072ASA01 |
| Landsat 5 | 5  | 1994 | LT51150751994136ASA00 |
| Landsat 5 | 6  | 1994 | LT51150751994168ASA00 |
| Landsat 5 | 7  | 1994 | LT51150751994184ASA00 |
| Landsat 5 | 8  | 1994 | LT51150751994232ASA00 |
| Landsat 5 | 9  | 1994 | LT51150751994248ASA00 |
| Landsat 5 | 10 | 1994 | LT51150751994296ASA00 |
| Landsat 5 | 11 | 1994 | LT51150751994312ASA00 |
| Landsat 5 | 1  | 1995 | LT51150751995011ASA00 |
| Landsat 5 | 3  | 1995 | LT51150751995075ASA00 |
| Landsat 5 | 4  | 1995 | LT51150751995107ASA00 |
| Landsat 5 | 5  | 1995 | LT51150751995139ASA00 |
| Landsat 5 | 6  | 1995 | LT51150751995155ASA00 |
| Landsat 5 | 7  | 1995 | LT51150751995203ASA00 |
| Landsat 5 | 8  | 1995 | LT51150751995219ASA00 |
| Landsat 5 | 10 | 1995 | LT51150751995299ASA00 |
| Landsat 5 | 11 | 1995 | LT51150751995315ASA00 |
| Landsat 5 | 12 | 1995 | LT51150751995363ASA00 |
| Landsat 5 | 2  | 1996 | LT51150751996046ASA00 |

---

---

|           |    |      |                        |
|-----------|----|------|------------------------|
| Landsat 5 | 3  | 1996 | LT51150751996078ASA00  |
| Landsat 5 | 4  | 1996 | LT51150751996094ASA00  |
| Landsat 5 | 5  | 1996 | LT51150751996142ASA00  |
| Landsat 5 | 6  | 1996 | LT51150751996174ASA00  |
| Landsat 5 | 8  | 1996 | LT51150751996222ASA00  |
| Landsat 5 | 9  | 1996 | LT51150751996270ASA00  |
| Landsat 5 | 10 | 1996 | LT51150751996286ASA00  |
| Landsat 5 | 11 | 1996 | LT51150751996318ASA00  |
| Landsat 5 | 1  | 1997 | LT51150751997016ASA00  |
| Landsat 5 | 3  | 1997 | LT51150751997064ASA00  |
| Landsat 5 | 4  | 1997 | LT51150751997112ASA00  |
| Landsat 5 | 5  | 1997 | LT51150751997144ASA00  |
| Landsat 5 | 7  | 1997 | LT51150751997192ASA00  |
| Landsat 5 | 8  | 1997 | LT51150751997224ASA00  |
| Landsat 5 | 10 | 1997 | LT51150751997304ASA00  |
| Landsat 5 | 12 | 1997 | LT51150751997352ASA00  |
| Landsat 5 | 1  | 1998 | LT51150751998003ASA00  |
| Landsat 5 | 2  | 1998 | LT51150751998035ASA00  |
| Landsat 5 | 3  | 1998 | LT51150751998067ASA00  |
| Landsat 5 | 4  | 1998 | LT51150751998115ASA00  |
| Landsat 5 | 6  | 1998 | LT51150751998179ASA00  |
| Landsat 5 | 8  | 1998 | LT51150751998243ASA00  |
| Landsat 5 | 9  | 1998 | LT51150751998259ASA00  |
| Landsat 5 | 10 | 1998 | LT51150751998291ASA00  |
| Landsat 5 | 11 | 1998 | LT51150751998323ASA00  |
| Landsat 5 | 12 | 1998 | LT51150751998355ASA00  |
| Landsat 5 | 2  | 1999 | LT51150751999054ASA00  |
| Landsat 5 | 3  | 1999 | LT51150751999070ASA00  |
| Landsat 5 | 4  | 1999 | LT51150751999102ASA00  |
| Landsat 5 | 6  | 1999 | LT51150751999166ASA00  |
| Landsat 5 | 7  | 1999 | LT51150751999198ASA00  |
| Landsat 5 | 8  | 1999 | LT51150751999230ASA00  |
| Landsat 5 | 9  | 1999 | LT51150751999262ASA00  |
| Landsat 5 | 10 | 1999 | LT51150751999294ASA00  |
| Landsat 5 | 11 | 1999 | LT51150751999310ASA00  |
| Landsat 5 | 12 | 1999 | LT51150751999358ASA00* |
| Landsat 7 | 1  | 2000 | LE71150752000017SGS00  |
| Landsat 7 | 3  | 2000 | LE71150752000065ASA00  |
| Landsat 7 | 4  | 2000 | LE71150752000097ASA00  |
| Landsat 7 | 8  | 2000 | LE71150752000225ASA00* |
| Landsat 7 | 12 | 2000 | LE71150752000337ASA00  |
| Landsat 7 | 5  | 2001 | LE71150752001131ASA00  |

---

---

|           |    |      |                        |
|-----------|----|------|------------------------|
| Landsat 7 | 8  | 2001 | LE71150752001243ASA00  |
| Landsat 7 | 9  | 2001 | LE71150752001259ASA00  |
| Landsat 7 | 2  | 2002 | LE71150752002038ASA00  |
| Landsat 7 | 3  | 2002 | LE71150752002070ASA00  |
| Landsat 7 | 4  | 2002 | LE71150752002102SGS00  |
| Landsat 7 | 7  | 2002 | LE71150752002198ASA00  |
| Landsat 7 | 12 | 2002 | LE71150752002342ASA00  |
| Landsat 7 | 3  | 2003 | LE71150752003089ASA00  |
| Landsat 5 | 7  | 2003 | LT51150752003193ASA01* |
| Landsat 5 | 8  | 2003 | LT51150752003225ASA01  |
| Landsat 5 | 9  | 2003 | LT51150752003257ASA01  |
| Landsat 5 | 10 | 2003 | LT51150752003289ASA01  |
| Landsat 5 | 11 | 2003 | LT51150752003305ASA01  |
| Landsat 5 | 12 | 2003 | LT51150752003353ASA01* |
| Landsat 5 | 1  | 2004 | LT51150752004020ASA01  |
| Landsat 5 | 2  | 2004 | LT51150752004036ASA01  |
| Landsat 5 | 3  | 2004 | LT51150752004068ASA01  |
| Landsat 5 | 4  | 2004 | LT51150752004116ASA01  |
| Landsat 5 | 5  | 2004 | LT51150752004132ASA01  |
| Landsat 5 | 6  | 2004 | LT51150752004164XXX01  |
| Landsat 5 | 8  | 2004 | LT51150752004228ASA00  |
| Landsat 5 | 9  | 2004 | LT51150752004260ASA00  |
| Landsat 5 | 10 | 2004 | LT51150752004292ASA00  |
| Landsat 5 | 11 | 2004 | LT51150752004324ASA00  |
| Landsat 5 | 12 | 2004 | LT51150752004356ASA00  |
| Landsat 5 | 1  | 2005 | LT51150752005022ASA02  |
| Landsat 5 | 2  | 2005 | LT51150752005054ASA01  |
| Landsat 5 | 6  | 2005 | LT51150752005166ASA01  |
| Landsat 5 | 7  | 2005 | LT51150752005198ASA01  |
| Landsat 5 | 8  | 2005 | LT51150752005230ASA01  |
| Landsat 5 | 9  | 2005 | LT51150752005262ASA01  |
| Landsat 5 | 10 | 2005 | LT51150752005278ASA01  |
| Landsat 5 | 11 | 2005 | LT51150752005310ASA01  |
| Landsat 5 | 2  | 2006 | LT51150752006041ASA00  |
| Landsat 5 | 4  | 2006 | LT51150752006105ASA00  |
| Landsat 5 | 5  | 2006 | LT51150752006137ASA01  |
| Landsat 5 | 6  | 2006 | LT51150752006169ASA01  |
| Landsat 5 | 7  | 2006 | LT51150752006201ASA00  |
| Landsat 5 | 8  | 2006 | LT51150752006217ASA00  |
| Landsat 5 | 9  | 2006 | LT51150752006265ASA00  |
| Landsat 5 | 10 | 2006 | LT51150752006281ASA00* |
| Landsat 5 | 11 | 2006 | LT51150752006313ASA00  |

---

---

|           |    |      |                        |
|-----------|----|------|------------------------|
| Landsat 5 | 12 | 2006 | LT51150752006345ASA00  |
| Landsat 5 | 1  | 2007 | LT51150752007028ASA00  |
| Landsat 5 | 3  | 2007 | LT51150752007060ASA00  |
| Landsat 5 | 4  | 2007 | LT51150752007108ASA00  |
| Landsat 5 | 6  | 2007 | LT51150752007172ASA00  |
| Landsat 5 | 7  | 2007 | LT51150752007188ASA00  |
| Landsat 5 | 8  | 2007 | LT51150752007220ASA00* |
| Landsat 5 | 9  | 2007 | LT51150752007252ASA00  |
| Landsat 5 | 2  | 2008 | LT51150752008047ASA00  |
| Landsat 5 | 10 | 2008 | LT51150752008287ASA00  |
| Landsat 5 | 11 | 2008 | LT51150752008319ASA00* |
| Landsat 5 | 3  | 2009 | LT51150752009081ASA00  |
| Landsat 5 | 5  | 2009 | LT51150752009129ASA00  |
| Landsat 5 | 10 | 2009 | LT51150752009289ASA00  |
| Landsat 5 | 1  | 2010 | LT51150752010020ASA00  |
| Landsat 5 | 2  | 2010 | LT51150752010052ASA00  |
| Landsat 5 | 5  | 2010 | LT51150752010132ASA00  |
| Landsat 5 | 6  | 2010 | LT51150752010180ASA00  |
| Landsat 5 | 12 | 2010 | LT51150752010356ASA00* |
| Landsat 5 | 4  | 2011 | LT51150752011119ASA00  |
| Landsat 5 | 6  | 2011 | LT51150752011167ASA00* |
| Landsat 8 | 4  | 2013 | LC81150752013108LGN01  |
| Landsat 8 | 6  | 2013 | LC81150752013172LGN00  |
| Landsat 8 | 7  | 2013 | LC81150752013188LGN00  |
| Landsat 8 | 8  | 2013 | LC81150752013220LGN00  |
| Landsat 8 | 9  | 2013 | LC81150752013252LGN00* |
| Landsat 8 | 11 | 2013 | LC81150752013316LGN00  |
| Landsat 8 | 12 | 2013 | LC81150752013348LGN00  |
| Landsat 8 | 2  | 2014 | LC81150752014047LGN00  |
| Landsat 8 | 3  | 2014 | LO81150752014063LGN00  |
| Landsat 8 | 4  | 2014 | LC81150752014095LGN00  |
| Landsat 8 | 5  | 2014 | LC81150752014143LGN00  |
| Landsat 8 | 7  | 2014 | LC81150752014191LGN00* |
| Landsat 8 | 8  | 2014 | LC81150752014223LGN00  |
| Landsat 8 | 9  | 2014 | LC81150752014255LGN00  |
| Landsat 8 | 10 | 2014 | LC81150752014287LGN00  |
| Landsat 8 | 11 | 2014 | LC81150752014319LGN00  |
| Landsat 8 | 12 | 2014 | LC81150752014351LGN00  |
| Landsat 8 | 2  | 2015 | LC81150752015034LGN00  |
| Landsat 8 | 4  | 2015 | LC81150752015114LGN00  |
| Landsat 8 | 5  | 2015 | LC81150752015130LGN00  |
| Landsat 8 | 6  | 2015 | LC81150752015162LGN00  |

---

---

|           |    |      |                       |
|-----------|----|------|-----------------------|
| Landsat 8 | 7  | 2015 | LC81150752015210LGN00 |
| Landsat 8 | 9  | 2015 | LC81150752015258LGN00 |
| Landsat 8 | 10 | 2015 | LC81150752015274LGN00 |
| Landsat 8 | 12 | 2015 | LC81150752015354LGN00 |
| Landsat 8 | 2  | 2016 | LC81150752016037LGN01 |
| Landsat 8 | 3  | 2016 | LC81150752016069LGN00 |
| Landsat 8 | 5  | 2016 | LC81150752016133LGN00 |

---

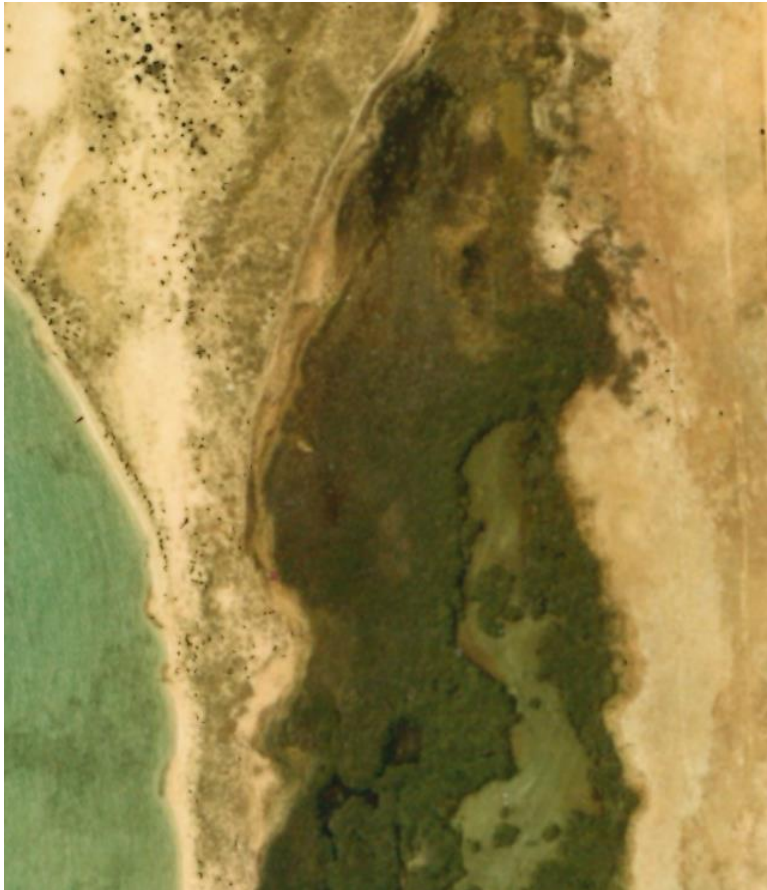

Figure SI 10: A close-up of the 1985 image prior to georectification to highlight the loss of green canopy apparent in the top left section of the forest. See Figure 4 for scale and location information.
